# Supplementary material for: Short-term glucocorticoids reduce risk of chronic NSAID and analgesic use in early methotrexate-treated rheumatoid arthritis patients with favourable prognosis: subanalysis of the CareRA randomised controlled trial
Source: PubMed Central journal article supplement — RMD Open. 2021 May 24;7(2):e001615. doi: 10.1136/rmdopen-2021-001615 (PMC8149441; doi:10.1136/rmdopen-2021-001615), 2021-05-24
Supplement: rmdopen-2021-001615supp001.pdf [file rmdopen-2021-001615supp001.pdf]

**Supplemental Figure 1:** Stratification scheme: Classification of patients in high or low-risk according to poor prognostic factors

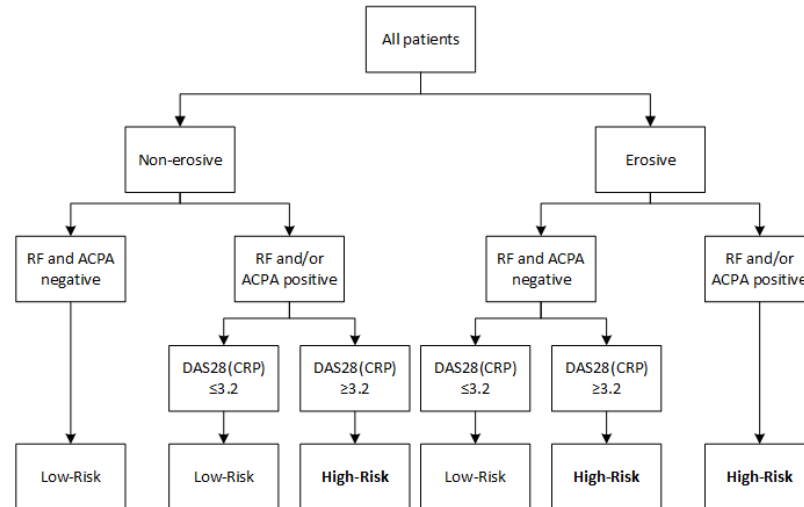

RF= Rheumatoid Factor, ACPA= Anti-Citrullinated Protein Antibody, DAS28 (CRP) = 28 joint disease activity score calculated with C-reactive protein.

**Supplemental Table 1:** Adjusted p-values with the Holm-Bonferroni method to account for multiple testing.

| Comparison                                                                | Values<br>(COBRA Slim<br>vs<br>TSU) | Statistical test          | p-value          | Adjusted p-value     |
|---------------------------------------------------------------------------|-------------------------------------|---------------------------|------------------|----------------------|
| <i>Proportion of patients taking analgesics at any timepoint</i>          | 26/43<br>vs<br>43/47                | Chi-square                | 0.0005091        | 0.004050             |
| <i>Proportion of patients on chronic analgesics</i>                       | 9/43<br>vs<br>25/47                 | Chi-square                | 0.001615         | 0.004050             |
| <i>Proportion of patients on chronic NSAIDs</i>                           | 6/43<br>vs<br>19/47                 | Chi-square                | 0.005099         | 0.0091782            |
| <i>Proportion of patients on analgesics before the start of the trial</i> | 33/43<br>vs<br>32/47                | Chi-square                | 0.3596           | 0.4623429            |
| <i>Proportion of patients on analgesics at baseline</i>                   | 18/43<br>vs<br>28/47                | Chi-square                | 0.0931           | 0.139650             |
| <i>Baseline VAS pain (mean ± SE)</i>                                      | 48±6<br>vs<br>52±4                  | ANOVA                     | 0.50394          | 0.5669325            |
| <i>Baseline DAS28CRP (mean ± SE)</i>                                      | 4.5±0.3<br>vs<br>4.6±0.2            | ANOVA                     | 0.885941         | 0.885941             |
| <i>Survival to time of first chronic analgesic intake (mean ± SE)</i>     | 85.8±5.5<br>vs<br>54.0±7.2          | Log-rank<br>Gehan-Breslow | 0.0018<br>0.0010 | 0.004050<br>0.004050 |

NSAIDs: non-steroidal drugs, VAS: visual analogue scale, DAS28CRP: disease activity score in 28 joints with C-reactive protein, SE: standard error

**Supplemental Table 2:** Demographic and clinical characteristics at baseline per treatment scheme.

|                                       | <b>COBRA Slim</b> | <b>Tight-Step-Up</b> |
|---------------------------------------|-------------------|----------------------|
|                                       | <b>n=43</b>       | <b>n=47</b>          |
| <b>Demographic variables</b>          |                   |                      |
| Age, years                            | 51 (14)           | 51 (14)              |
| Women, n (%)                          | 33 (77)           | 38 (81)              |
| Smokers, n smoked ever (%)            | 21 (49)           | 18 (38)              |
| Current work n (%)                    | 22 (51)           | 27 (57)              |
| <b>Clinical variables</b>             |                   |                      |
| Body mass index, kg/m <sup>2</sup>    | 25 (4)            | 27 (4)               |
| Symptom duration, weeks; median (IQR) | 21 (14-35)        | 19 (13-33)           |
| RF positive, n (%)                    | 11 (26)           | 11 (23)              |
| Anti-CCP positive, n (%)              | 12 (28)           | 11 (23)              |
| Erosive disease, n (%)                | 1 (2)             | 0 (0)                |
| DAS28-CRP                             | 4.50 (2.25)       | 4.55 (1.63)          |
| Pain, mm (0-100)                      | 48 (31)           | 52 (23)              |
| Fatigue, mm (0-100)                   | 39 (28)           | 46 (22)              |
| HAQ score (0-3)                       | 0.81 (0.85)       | 0.85 (0.72)          |

Data are presented as mean and standard deviation (SD) unless otherwise specified.

Symptom duration= number of weeks between onset of symptoms and start of treatment; RF= Rheumatoid factor; Anti-CCP= Anti cyclic citrullinated protein; DAS28= Disease activity score on 28 joints; CRP= C-reactive protein; HAQ= Health Assessment Questionnaire

**Supplemental Table 3:** Evolution over time of pain, DAS28CRP, patient's global health assessment, and CRP per treatment group and chronicity of NSAID/analgesic use:

## VAS pain (0-100 scale)

| Treatment group | Analgesic use      | Visit weeks |          |          |          |
|-----------------|--------------------|-------------|----------|----------|----------|
|                 |                    | 0           | 8        | 52       | 104      |
| COBRA Slim      | Chronic (n=9)      | 63.3±6.7    | 36.4±6.6 | 27.4±6.0 | 26.0±6.2 |
|                 | Non-chronic (n=34) | 37.4±5.8    | 21.2±4.8 | 19.8±5.1 | 19.6±5.1 |
| Tight-Step-Up   | Chronic (n=25)     | 53.7±3.7    | 36.0±3.4 | 24.8±3.4 | 25.5±3.5 |
|                 | Non-chronic (n=22) | 45.1±8.5    | 25.9±5.3 | 27.4±9.5 | 31.9±9.1 |

## Disease activity score in 28 joints with C-reactive protein (DAS28CRP)

| Treatment group | Analgesic use      | Visit weeks |         |         |         |
|-----------------|--------------------|-------------|---------|---------|---------|
|                 |                    | 0           | 8       | 52      | 104     |
| COBRA Slim      | Chronic (n=9)      | 5.1±0.4     | 3.0±0.3 | 2.4±0.3 | 2.2±0.2 |
|                 | Non-chronic (n=34) | 4.1±0.3     | 2.3±0.2 | 2.0±0.2 | 1.9±0.2 |
| Tight-Step-Up   | Chronic (n=25)     | 4.4±0.3     | 3.5±0.2 | 2.3±0.1 | 2.2±0.2 |
|                 | Non-chronic (n=22) | 5.0±0.6     | 2.7±0.4 | 2.2±0.2 | 2.2±0.3 |

## Patients global health assessment (0-100 scale)

| Treatment group | Analgesic use      | Visit weeks |          |          |          |
|-----------------|--------------------|-------------|----------|----------|----------|
|                 |                    | 0           | 8        | 52       | 104      |
| COBRA Slim      | Chronic (n=9)      | 63.9±6.9    | 34.0±6.9 | 27.7±6.3 | 21.8±5.5 |
|                 | Non-chronic (n=34) | 37.6±5.4    | 22.9±4.8 | 18.6±4.6 | 17.9±4.3 |
| Tight-Step-Up   | Chronic (n=25)     | 50.7±3.7    | 40.8±3.9 | 27.2±3.4 | 27.5±3.2 |
|                 | Non-chronic (n=22) | 46.4±8.5    | 23.9±5.7 | 25.4±8.3 | 29.3±5.7 |

## C-reactive protein (mg/L)

| Treatment group | Analgesic use      | Visit weeks |         |         |         |
|-----------------|--------------------|-------------|---------|---------|---------|
|                 |                    | 0           | 8       | 52      | 104     |
| COBRA Slim      | Chronic (n=9)      | 34.8±13.0   | 8.0±3.0 | 2.9±1.3 | 5.2±2.4 |
|                 | Non-chronic (n=34) | 9.6±3.3     | 6.2±2.2 | 5.4±1.9 | 3.2±1.9 |
| Tight-Step-Up   | Chronic (n=25)     | 13.5±3.2    | 8.7±2.6 | 5.6±1.2 | 7.2±1.9 |
|                 | Non-chronic (n=22) | 13.6±4.2    | 7.0±5.1 | 4.5±2.2 | 3.7±3.8 |

Data presented as mean and standard error

**Supplemental Table 4:** Number of patients with drug intake of the different types of analgesics: acetaminophen, NSAIDs, opioids (weak and strong), and antidepressants (as neuropathic pain drugs) at every visit week during the 2-year CareRA trial between COBRA Slim and Tight-Step-Up patients. Patients can be counted in more than one type of medication when taken in combination.

**COBRA Slim (n=43)**

| Medication       | Trial weeks |        |        |        |        |        |         |        |         |        |        |
|------------------|-------------|--------|--------|--------|--------|--------|---------|--------|---------|--------|--------|
|                  | 0           | 4      | 8      | 16     | 28     | 40     | 52      | 65     | 78      | 91     | 104    |
| Acetaminophen    | 5 (12)      | 3 (7)  | 3 (7)  | 5 (12) | 5 (12) | 6 (14) | 6 (14)  | 6 (14) | 5 (12)  | 7 (16) | 6 (14) |
| NSAIDs           | 16 (37)     | 8 (19) | 6 (14) | 6 (14) | 7 (16) | 7 (16) | 10 (23) | 9 (21) | 10 (23) | 8 (19) | 7 (16) |
| Opioids (strong) | 1 (2)       | 1 (2)  | 1 (2)  | 1 (2)  | 1 (2)  | 1 (2)  | 1 (2)   | 1 (2)  | 1 (2)   | 1 (2)  | 1 (2)  |
| Opioids (weak)   | 2 (5)       | -      | -      | 1 (2)  | 1 (2)  | 2 (5)  | 2 (5)   | 3 (7)  | 2 (5)   | 2 (5)  | 2 (5)  |
| Antidepressants  | 1 (2)       | 1 (2)  | 1 (2)  | 1 (2)  | 1 (2)  | 1 (2)  | 1 (2)   | 1 (2)  | 1 (2)   | 1 (2)  | 1 (2)  |

**Tight-Step-Up (n=47)**

| Medication       | Trial weeks |         |         |         |         |         |         |         |         |         |         |
|------------------|-------------|---------|---------|---------|---------|---------|---------|---------|---------|---------|---------|
|                  | 0           | 4       | 8       | 16      | 28      | 40      | 52      | 65      | 78      | 91      | 104     |
| Acetaminophen    | 7 (15)      | 9 (19)  | 9 (19)  | 8 (17)  | 10 (21) | 11 (23) | 8 (17)  | 9 (19)  | 10 (21) | 10 (21) | 11 (23) |
| NSAIDs           | 25 (53)     | 35 (74) | 32 (68) | 30 (64) | 25 (53) | 22 (47) | 21 (45) | 19 (40) | 19 (40) | 20 (43) | 19 (40) |
| Opioids (strong) | -           | -       | -       | -       | -       | -       | -       | -       | -       | -       | -       |
| Opioids (weak)   | 3 (6)       | 4 (9)   | 4 (9)   | 3 (6)   | 4 (9)   | 5 (11)  | 4 (9)   | 3 (6)   | 3 (6)   | 3 (6)   | 3 (6)   |
| Antidepressants  | 1 (2)       | 1 (2)   | 1 (2)   | 1 (2)   | 1 (2)   | 1 (2)   | 1 (2)   | 1 (2)   | 1 (2)   | 1 (2)   | 1 (2)   |

Data presented as number of patients and between brackets the percentage of them from their treatment strategy total

**Supplemental Figure 2:** Graphic representation of the use of a) NSAIDs and b) opioids in patients taking these drugs daily and chronically during the 2-year CareRA trial. Each line represents the time window of DC NSAID/opioid use in one patient. One patient of the Tight-Step-Up arm is not represented (on combination of acetaminophen + antidepressant).

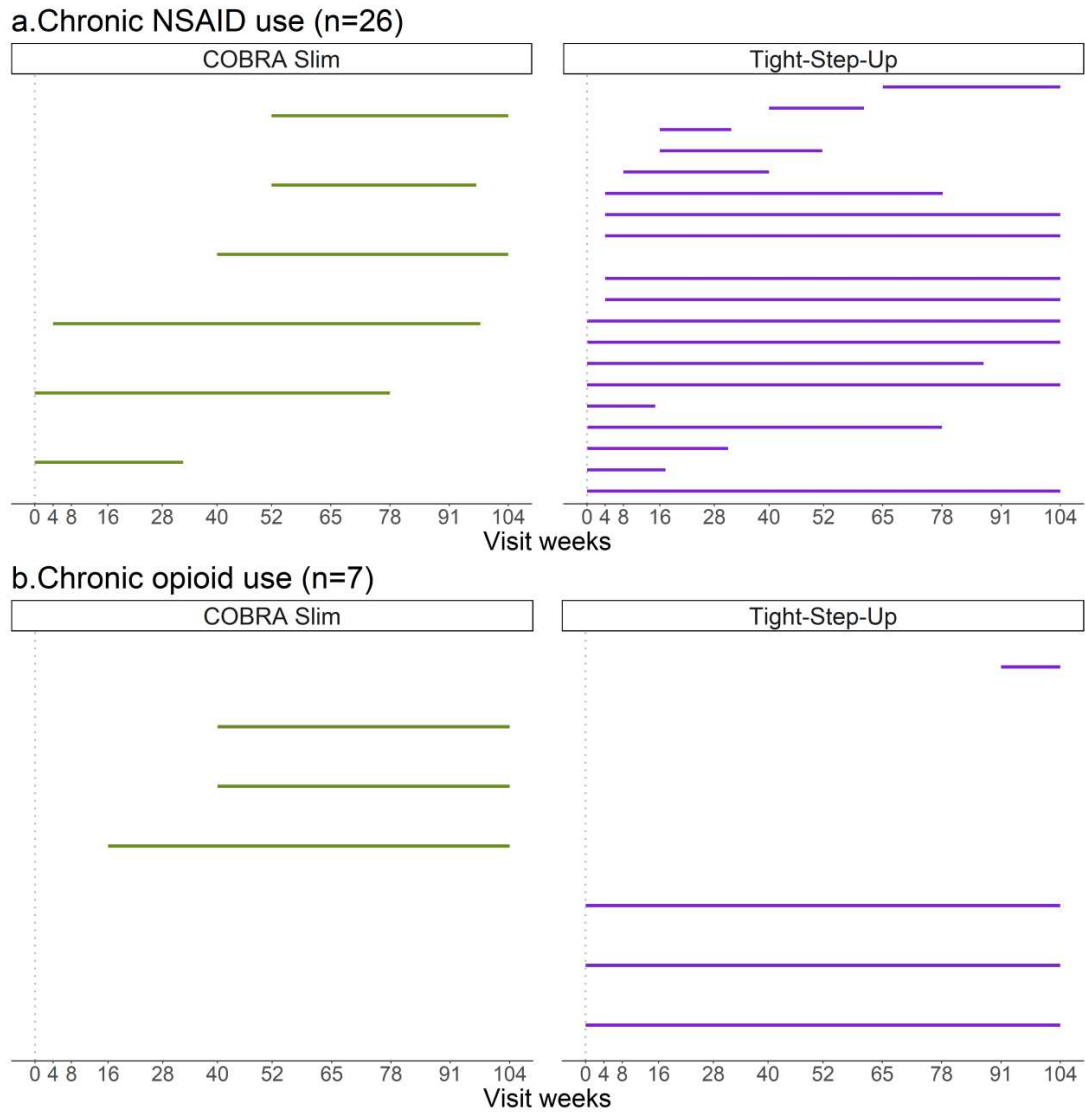

**Supplemental Table 5:** Dose, duration, and number of patients per analgesic in the case of chronic use, per treatment group.

| Medication      | Tight-Step-Up   |                              |               | COBRA Slim      |                              |               |
|-----------------|-----------------|------------------------------|---------------|-----------------|------------------------------|---------------|
|                 | Mean daily dose | Mean duration of use in days | # of patients | Mean daily dose | Mean duration of use in days | # of patients |
| Acetaminophen   | 2.3g            | 670.0                        | 3             | 650mg           | 543.5                        | 2             |
| NSAIDs          | -               | 327.9                        | 20            | -               | 346.3                        | 6             |
| Ibuprofen       | 1.2g            | 432.0                        | 1             | 1.2g            | 444.0                        | 2             |
| Diclofenac      | 127.5mg         | 272.0                        | 6             | 150mg           | 199.5                        | 3             |
| Meloxicam       | 11.25mg         | 433.0                        | 2             | 15mg            | 316.0                        | 1             |
| Naproxen        | 950mg           | 174.3                        | 5             | -               | -                            | -             |
| Piroxicam       | 20mg            | 299.8                        | 6             | -               | -                            | -             |
| Etoricoxib      | 101.5mg         | 483.3                        | 4             | -               | -                            | -             |
| Indomethacin    | 125.0mg         | 339.3                        | 3             | -               | -                            | -             |
| Aceclofenac     | 150.0mg         | 418.5                        | 2             | -               | -                            | -             |
| Proglumetacin   | -               | -                            | -             | 450.0mg         | 133.0                        | 1             |
| Phenylbutazone  | -               | -                            | -             | 200.0mg         | 247.0                        | 1             |
| Oxaprozin       | -               | -                            | -             | 1.2g            | 729.0                        | 1             |
| Opioids         | -               | 347.7                        | 3             | -               | 521.7                        | 3             |
| Tramadol        | 133.3mg         | 347.7                        | 3             | 75.0mg          | 552.5                        | 2             |
| Methadone       | -               | -                            | -             | 30.0mg          | 460.0                        | 1             |
| Antidepressants | 60mg            | 723.0                        | 1             | 37.5mg          | 381.7                        | 1             |
| Duloxetine      | 60mg            | 723.0                        | 1             | -               | -                            | 1             |
| Nortriptyline   | -               | -                            | 1             | 37.5mg          | 381.7                        | 1             |

**Supplemental Table 6:** Analgesics and NSAIDs specifically prescribed for RA with chronic daily intake per treatment group. Each row corresponds to a patient. Some patients had either a combination of different analgesics/NSAIDs or consecutive courses of the same analgesic/NSAID.

| Treatment group      | Medication    | Total daily dosage | Total time of intake in days | Week of start within the trial |
|----------------------|---------------|--------------------|------------------------------|--------------------------------|
| <b>COBRA Slim</b>    | Meloxicam     | 15mg               | 315                          | 52                             |
|                      | Diclofenac    | 150mg              | 228                          | Baseline                       |
|                      | Oxaprozin     | 1200mg             | 561                          | Baseline                       |
| <b>Tight-Step-Up</b> | Piroxicam     | 20mg               | 137                          | Baseline                       |
|                      | Piroxicam     | 20mg               | 244                          | 4                              |
|                      | Naproxen      | 1000mg             | 121                          | Baseline                       |
|                      | Meloxicam     | 7.5mg              | 146                          | 40                             |
|                      | Naproxen      | 500mg              | 105                          | Baseline                       |
|                      | Naproxen      | 1000mg             | 353                          | 28                             |
|                      | Diclofenac    | 150mg              | 179                          | 78                             |
|                      | Meloxicam     | 15mg               | 718                          | 4                              |
|                      | Naproxen      | 1000mg             | 250                          | 16                             |
|                      | Naproxen      | 1000mg             | 90                           | 65                             |
|                      | Acetaminophen | 2g                 | 501                          | 28                             |
|                      | Celecoxib     | 200mg              | 217                          | Baseline                       |
|                      | Acetaminophen | 3g                 | 783                          | Baseline                       |
|                      | Tramadol      | 200mg              | 783                          | Baseline                       |
|                      | Etoricoxib    | 90mg               | 744                          | 4                              |
|                      | Etoricoxib    | 90mg               | 721                          | Baseline                       |
| Diclofenac           | 150mg         | 277                | Baseline                     |                                |



**Supplemental Figure 3:** Survival analysis of time to the first recorded use of chronic NSAID with Kaplan Meier

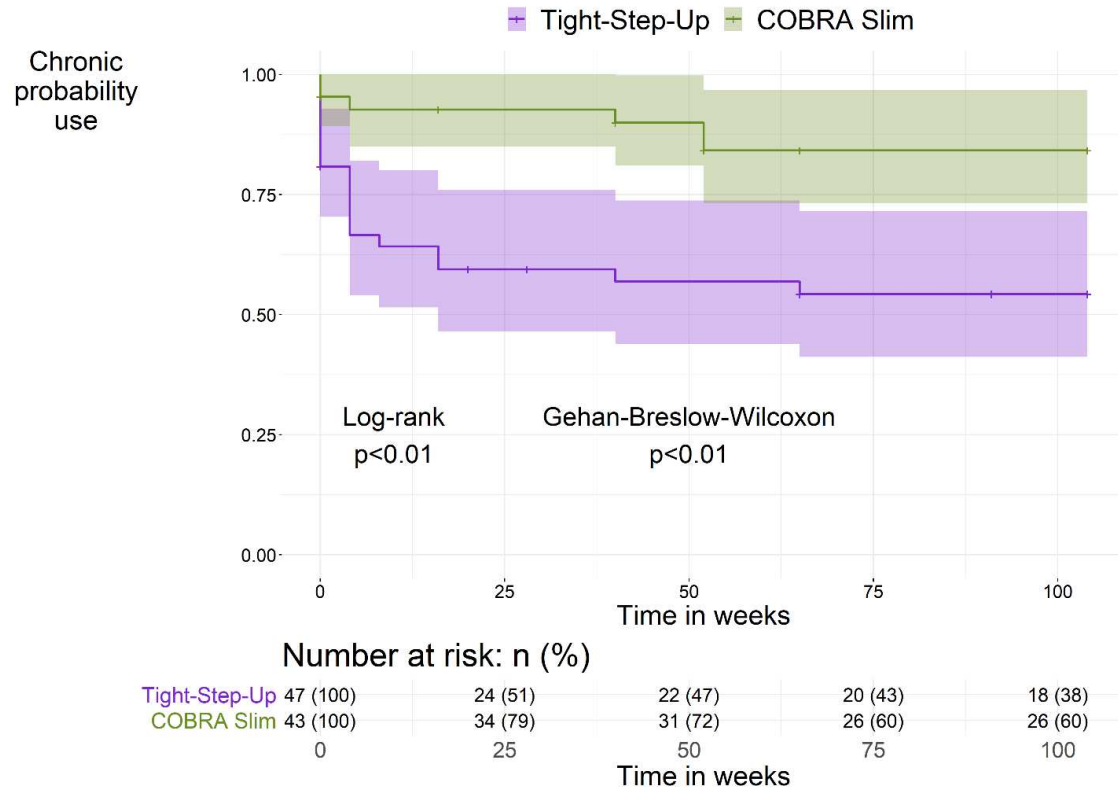

**Supplemental Table 7:** Cumulative events in time to first chronic analgesic use for COBRA Slim and Tight-Step-Up patients

| <b>COBRA Slim</b>    |                       |                         |                 |                       |                     |                     |
|----------------------|-----------------------|-------------------------|-----------------|-----------------------|---------------------|---------------------|
| <b>Time</b>          | <b>Number at risk</b> | <b>Number of events</b> | <b>Survival</b> | <b>Standard error</b> | <b>Lower 95% CI</b> | <b>Upper 95% CI</b> |
| 0                    | 43                    | 3                       | 0.930           | 0.0388                | 0.857               | 1.000               |
| 4                    | 36                    | 1                       | 0.904           | 0.0456                | 0.819               | 0.998               |
| 16                   | 35                    | 1                       | 0.879           | 0.0511                | 0.784               | 0.985               |
| 40                   | 34                    | 2                       | 0.827           | 0.0597                | 0.718               | 0.953               |
| 52                   | 31                    | 2                       | 0.774           | 0.0667                | 0.653               | 0.916               |
| <b>Tight-Step-Up</b> |                       |                         |                 |                       |                     |                     |
| <b>Time</b>          | <b>Number at risk</b> | <b>Number of events</b> | <b>Survival</b> | <b>Standard error</b> | <b>Lower 95% CI</b> | <b>Upper 95% CI</b> |
| 0                    | 47                    | 13                      | 0.723           | 0.0652                | 0.606               | 0.863               |
| 4                    | 34                    | 6                       | 0.596           | 0.0716                | 0.471               | 0.754               |
| 8                    | 28                    | 1                       | 0.574           | 0.0721                | 0.449               | 0.735               |
| 16                   | 27                    | 2                       | 0.532           | 0.0728                | 0.407               | 0.696               |
| 40                   | 23                    | 1                       | 0.509           | 0.0732                | 0.384               | 0.675               |
| 65                   | 22                    | 1                       | 0.486           | 0.0734                | 0.361               | 0.653               |
| 91                   | 20                    | 1                       | 0.461           | 0.0737                | 0.337               | 0.631               |
